# Supplementary material for: A facile one-step solution deposition via non-solvent/solvent mixture for efficient organometal halide perovskite light-emitting diodes
Source: Royal Society of Chemistry journal article supplement (doi:10.1039/c6nr01092j), 2016-01-01
Supplement: c6nr01092j1.pdf [file c6nr01092j1.pdf]

# A facile one-step solution deposition via non-solvent/solvent mixture for efficient organometal halide perovskite light-emitting diodes

Bo Jiao<sup>a,†</sup>, Xiaobo Zhu<sup>a</sup>, Wen Wu<sup>a</sup>, Hua Dong<sup>a</sup>, Bin Xia<sup>a</sup>, Jun Xi<sup>a</sup>, Ting Lei<sup>a</sup>, Xun Hou<sup>a</sup> and Zhaoxin Wu<sup>a,†,\*</sup>,

Key Laboratory of Photonics Technology for information, Key Laboratory for Physical Electronics and Devices of Ministry of Education, School of Electronic and Information Engineering, Xi'an Jiaotong University, Xi'an, 710049, P.R.China. E-mail: zhaoxinwu@mail.xjtu.edu.cn

<sup>†</sup>These authors contributed equally to this work

## Supporting Information

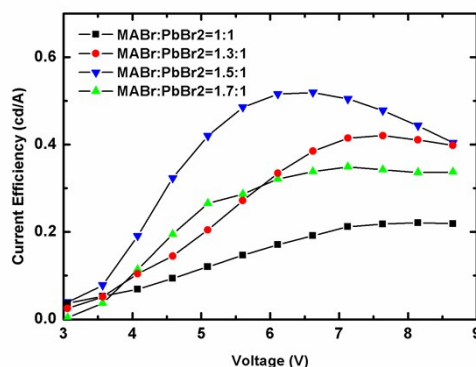

**Figure S1** Efficiency-voltage characteristics for devices fabricated by solutions with different MABr:PbBr<sub>2</sub> ratios of 1:1, 1.3:1, 1.5:1, and 1.7:1 respectively. The solvent is 4/10 CBZ/DMF mixture for all solutions.

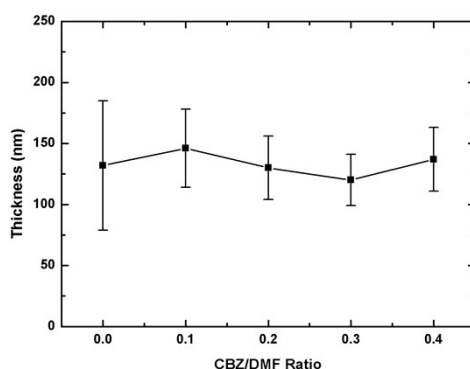

**Figure S2** Dependence of the thickness of the perovskite layer versus the CBZ/DMF ratio in the mixed solvent. The solution concentration is 20 wt.%. The thicknesses have been measured by profilometer for a single layer but at five different points of the film. The average values are plotted. Error bars correspond to the standard deviation. For film fabricated by 5 wt.% MAPbBr<sub>3</sub> solution using 4/10 CBZ/DMF solvent, its thickness is 48±17 nm.

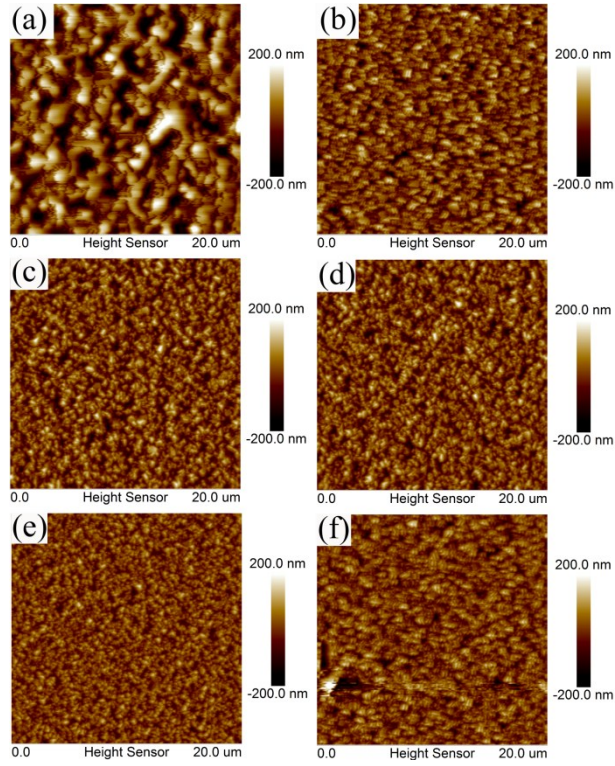

**Figure S3** AFM images of MAPbBr<sub>3</sub> films deposited on PEDOT:PSS/ITO substrate. MAPbBr<sub>3</sub> films were fabricated by solutions with different CBZ/DMF ratios of (a) 0/1, (b) 1/10, (c) 2/10, (d) 3/10, (e) 4/10, and (f) 4/10 respectively. The concentrations of solution (a)-(e) are 20 wt.%, and that of solution (f) is 5 wt.%.
